# Supplementary material for: Microscale hydrodynamic confinements: shaping liquids across length scales as a toolbox in life sciences
Source: Royal Society of Chemistry journal article supplement (doi:10.1039/d1lc01101d), 2022-01-01
Supplement: d1lc01101d1.zip [file d1lc01101d1.zip]

Archive with 3 entries (3 files):
- Supplementary information_Code.pdf
- PackagedApp.zip
- MatlabFiles.zip
